# Supplementary material
Source: PubMed Central journal article supplement (PMC5335579)
Supplement: 10.1194_M068882_jlr.M068882-1.pdf [file 10.1194_M068882_jlr.M068882-1.pdf]

# Supplemental Figure S1

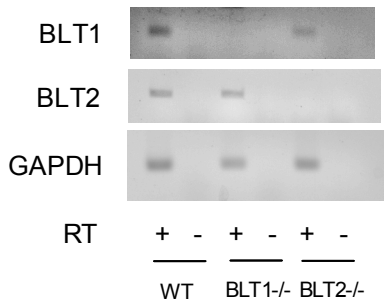

**Supplemental Figure S1. Expression of BLT1 and BLT2 in BMDM.** BMDM were isolated from WT, BLT1<sup>-/-</sup>, or BLT2<sup>-/-</sup> mice. Total mRNA was collected and incubated with (+) or without (-) reverse transcriptase (RT) prior to amplification using qRT-PCR and primers specific for BLT1, BLT2 and GAPDH. Amplified samples were visualized on a 2% agarose gel.
